# Supplementary material for: Inter-relationship between ageing, body mass index, diabetes, systemic blood pressure and intraocular pressure in Asians: 6-year longitudinal study
Source: PubMed Central journal article supplement — Br J Ophthalmol. 2018 Apr 9;103(2):196–202. doi: 10.1136/bjophthalmol-2018-311897 (PMC6362803; doi:10.1136/bjophthalmol-2018-311897), 2018-04-09
Supplement: bjophthalmol-2018-311897supp001.pdf [file bjophthalmol-2018-311897supp001.pdf]

**Supplementary Table 1. Association with Changes in Intraocular Pressure by Antihypertensive Medication Classes among Hypertensives who received Antihypertensive Medications *only* during follow-up (subgroup 2 [n = 139] and 22% from subgroup 3 [n = 361])**

| Medication Class                           | Change in Intraocular Pressure (mmHg)<br>β (95 CI) |
|--------------------------------------------|----------------------------------------------------|
| <b>Model with systolic blood pressure</b>  |                                                    |
| ACE inhibitors                             | -0.05 (-0.52 to 0.42)                              |
| ARB                                        | 0.33 (-0.25 to 0.92)                               |
| Calcium channel blockers                   | -0.04 (-0.48 to 0.41)                              |
| Diuretics                                  | 0.53 (-0.24 to 1.29)                               |
| Adrenergic receptor antagonists            | 0.03 (-2.42 to 2.46)                               |
| Beta blockers                              | -0.55 (-0.96 to -0.13)*                            |
| <b>Model with diastolic blood pressure</b> |                                                    |
| ACE inhibitors                             | -0.12 (-0.59 to 0.35)                              |
| ARB                                        | 0.35 (-0.24 to 0.93)                               |
| Calcium channel blockers                   | -0.02 (-0.47 to 0.43)                              |
| Diuretics                                  | 0.55 (-0.21 to 1.32)                               |
| Adrenergic receptor antagonists            | 0.01 (-2.40 to 2.42)                               |
| Beta blockers                              | -0.50 (-0.93 to -0.07)*                            |

CI = confidence interval

\*Denotes  $P < 0.05$ .

\*\* Model with systolic (or diastolic) blood pressure adjusted for individual antihypertensive medication classes, age, gender, ethnicity, IOP, body mass index, diabetes, SBP (or DBP) and change in SBP (or change in DBP).

**Supplementary Table 2. Association with Changes in Intraocular Pressure among Hypertensives who received Antihypertensive Medications *only* during follow-up (subgroup 2 [n = 139] and 22% from subgroup 3 [n = 361]) Assessed Using Multivariate Linear Regression Models with Generalized Estimating Equations**

| Characteristics                                 | Change in Intraocular Pressure (mmHg)<br>β (95 CI) |
|-------------------------------------------------|----------------------------------------------------|
| <b>Model with systolic blood pressure</b>       |                                                    |
| Baseline systolic blood pressure, per 10 mmHg   | 0.19 (0.05 to 0.32)*                               |
| Change in systolic blood pressure, per 10 mmHg  | 0.27 (0.17 to 0.31)**                              |
| Beta blockers                                   | -0.55 (-0.96 to -0.13)                             |
| <b>Model with diastolic blood pressure</b>      |                                                    |
| Baseline diastolic blood pressure, per 10 mmHg  | 0.18 (-0.08 to 0.43)                               |
| Change in diastolic blood pressure, per 10 mmHg | 0.33 (0.06 to 0.60)*                               |
| Beta blockers                                   | -0.50 (-0.93 to -0.07)                             |

CI = confidence interval

Data are β (95% confidence interval).

\*Denotes P < 0.05.

\*\*Denotes P < 0.001.

† Model with systolic (or diastolic) blood pressure adjusted for age, gender, ethnicity, IOP, body mass index, diabetes, SBP (or DBP), change in SBP (or change in DBP) and beta blockers.
